# Supplementary material for: Influencing factors and their interactions of water erosion based on yearly and monthly scale analysis: A case study in the Yellow River basin of China
Source: Copernicus journal article supplement (doi:10.5194/nhess-2019-122), 2019-04-30
Supplement: Supplementary file 1 [file nhess-2019-122-supplement.pdf]

1 **Supplementary materials**

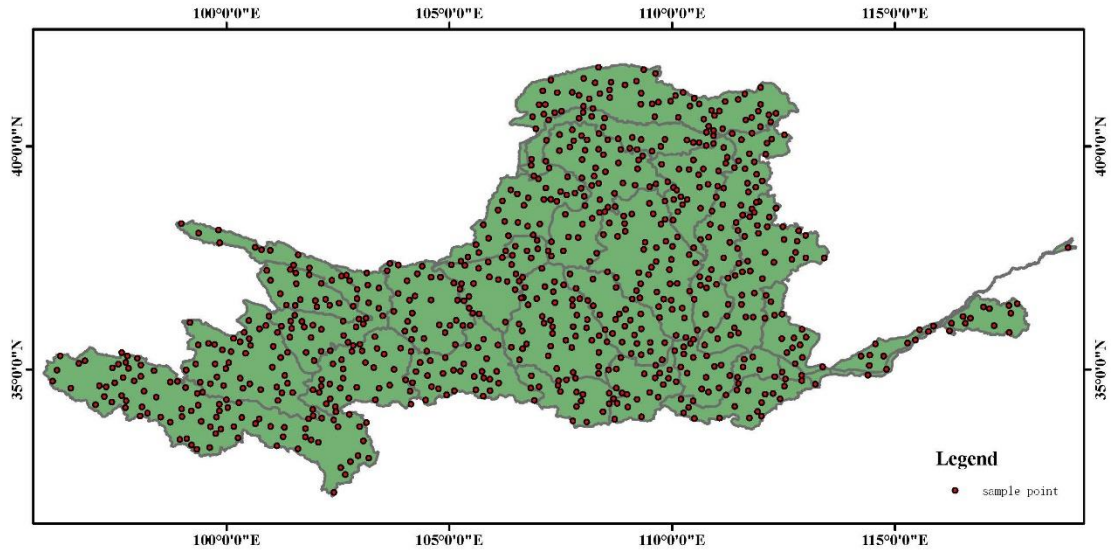

2

3 **Figure S1: Distribution of sample points required by the geographic detector model**

4

**Table S1. Reclassification schemes of the CCI LC land cover dataset**

|                          | CCI LC                                       |
|--------------------------|----------------------------------------------|
| 1 Forest                 | 50/60/61/62/70/71/72/80/81/82/90/100/160/170 |
| 2 Grassland              | 110/130/140                                  |
| 3 Shrub                  | 120/121/122                                  |
| 4 Cropland               | 10/11/12/20/30/40                            |
| 5 Wetland                | 180                                          |
| 6 Water                  | 210                                          |
| 7 Construction           | 190                                          |
| 8 Bare land              | 150/152/153/200/201/202                      |
| 9 Permanent ice and snow | 220                                          |

5

6

**Table S2. Parameter values of the R factor formula**

| Climatic zone | $\beta$                    | $\alpha$                                   | $\epsilon$                                     |
|---------------|----------------------------|--------------------------------------------|------------------------------------------------|
| BS            | 1.73                       | $\log \alpha = 1.85 - 1.348 \times \beta$  | 0.3296                                         |
| BW            | 1.514                      | $\log \alpha = 1.781 - 1.341 \times \beta$ | $2.123 - 0.04 \times lat$                      |
| Cf            | 1.5                        | $\log \alpha = 3.016 - 2.079 \times \beta$ | $-0.012 \times lon - 0.037 \times lat + 3.792$ |
| Cw            | 1.558                      | $\log \alpha = 2.935 - 1.94 \times \beta$  | 0.817                                          |
| Dw            | 1.466                      | $\log \alpha = 2.637 - 1.735 \times \beta$ | 1.24                                           |
| Df            | $2.243 - 0.008 \times lat$ | $\log \alpha = 9.458 - 5.236 \times \beta$ | $0.028 \times lon - 0.588$                     |

7 *lon* refers to the longitude, and *lat* refers to the latitude.
