# Supplementary material for: Influencing factors and their interactions of water erosion based on yearly and monthly scale analysis: A case study in the Yellow River basin of China
Source: Copernicus journal article supplement (doi:10.5194/nhess-2019-122), 2019-04-30
Supplement: Supplementary file [file nhess-2019-122-AC1-supplement.zip]

# Influencing factors and their interactions of water erosion based on yearly and monthly scale analysis: A case study in the Yellow River basin of China

Ting Hua<sup>1,2</sup>, Wenwu Zhao<sup>1,2</sup>, Yanxu Liu<sup>1,2</sup>, and Yue Liu<sup>1,2</sup>

<sup>1</sup>State Key Laboratory of Earth Surface Processes and Resource Ecology, Faculty of Geographical Science, Beijing Normal University, Beijing 100875, China

<sup>2</sup>Institute of Land Surface System and Sustainable Development, Faculty of Geographical Science, Beijing Normal University, Beijing 100875, China

Correspondence to: Wenwu Zhao ([zhaoww@bnu.edu.cn](mailto:zhaoww@bnu.edu.cn))

**Abstract.** In the Yellow River basin, soil erosion is a significant natural hazard problem, seriously hindering the sustainable development of society. An in-depth assessment of soil erosion and a quantitative identification of the influencing factors are important and fundamental for soil and water conservation. The RUSLE model and geographical detector method were applied to evaluate and identify the dominant factors and spatiotemporal variability in the Yellow River basin. We found that topographical factors such as slope and surface roughness were the dominant factors influencing the spatial distribution of soil erosion in the Yellow River basin, rainfall and vegetation were as follows. In the period of low rainfall and vegetation coverage, the interaction of rainfall and slope can enhance their impact on the distribution of soil erosion, the combination of vegetation and slope was the dominant interacting factor in other periods. The dominant driving factors of soil erosion variability were affected by changes in rainfall, but the contribution decreased. The spatial and temporal heterogeneity of soil erosion on a monthly scale was higher, and July had the highest amount of soil erosion with a multi-year average of 1238.5 ton/(km<sup>2</sup>·a). The results provide a better understanding of the relationships between soil erosion and its latent factors in the Yellow River basin. Given the temporal and spatial heterogeneity effects of geographical conditions, especially at the basin scale, policy-makers should form a collaborative environmental governance framework to minimize the risk of soil erosion.

## 1 Introduction

Soil erosion has the potential to change soil structure and negatively affects soil fertility, land productivity, food security, biological diversity and the global carbon (C) cycle; additionally, soil erosion is likely the most dangerous form of soil degradation worldwide (Amundson et al., 2015; Van Oost et al., 2012; Alexandridis et al., 2015; Keesstra et al 2016; Lal, R., 2004). It is a global environmental and ecological issue that seriously hinders the sustainable development of society (Borrelli et al., 2017; Martinez-Casasnovas et al., 2016; Kefi et al., 2011). On the one hand, soil erosion is closely related to agricultural production. By removing the most fertile topsoil, soil erosion reduces soil productivity and,

where soils are shallow, may cause irreversible loss of natural cultivated land (Sabbi and Salvati, 2014). On the other hand, soil erosion rate is very sensitive to climate, land-use and conservation practices at farm level. In sum, the assessment of soil erosion and the identification of soil erosion impact factors are essential. Although a large number of soil erosion assessments have been carried out on different spatial scales, the relationships between environmental factors and soil erosion are not consistent among various research conditions. How to quantify the effect of environmental factors on the distribution and variability of soil erosion, especially considering the interaction of environmental factors, is still a question that must be answered by conducting multiple analyses of regions that experience high soil erosion.

The identification of the mechanisms of soil erosion and factors affecting soil erosion is an important basis for land use management and ecosystem government. Several studies have focused on determining the driving forces affecting soil erosion, including precipitation, geomorphology, land use type, vegetation, and soil physical properties (Vrieling, 2006; Zhou et al., 2008; Peng and Wang, 2012; Gao and Wang, 2018; Beskow et al., 2009; Tian et al., 2009). Climate factors such as precipitation, temperature and evaporation, all affect regional soil erosion. Among them, rainfall is the driving force of soil erosion and one of the most important factors affecting erosion. From the time of rainfall exposure to the land surface, the process of splashing and spurting by raindrops has a significant impact on soil erosion. Terrain is one of the important natural geomorphic factors affecting soil erosion, and it is one of the lower interface factors affecting the formation and development of soil erosion. Different characteristics of topography and their changing tendency correspond to different features of slope runoff and confluence, which affect the occurrence and intensity of soil erosion directly (Yang et al., 2007). Among them, the influence of slope on soil erosion is finally reflected by the runoff of the slope and their flow velocity, which is an important factor restricting the spatial distribution of productivity. For vegetation, the vegetation canopy can protect the surface soil from direct impact from raindrops and weaken runoff, thus eventually reducing soil erosion. Excessive land reclamation, unreasonable production activities and land use patterns, and the reductions in surface vegetation cover have a magnifying effect on soil erosion (Wu and Cai., 2003).

The Yellow River, especially the middle reaches located on the Loess Plateau, is the region with the most serious soil erosion caused by water in the world (Liu and Liu, 2010; Sun et al., 2014). The

Chinese Government has undertaken numerous soil conservation projects in the Yellow River, especially the Grain-for-Green Program that started in 1998, which has greatly improved the ecological and environmental quality in this region and is expected to influence soil erosion (Gao et al., 2011; Fu et al., 2011). The research of soil erosion in the Yellow River Basin has attracted the attention many scholars and their work mainly focused on the assessment of soil erosion and the identification of impact factors. For example, Sun et al. (2013; 2014) explored the effects of rainfall, vegetation cover, land cover and topography on soil erosion risk in the Loess Plateau. Zhao et al. (2018) identified the risk of soil erosion in the middle reaches of the Yellow River from 1978 to 2010 dynamically. Du et al. (2016) assessed the risk caused by water and wind in the watershed of the Ningxia-Inner Mongolia reach of the Yellow River.

Previous studies have primarily been concerned with the identification and quantification of single factors; however, research on the effects of multi-factor interactions on soil erosion is insufficient. The variation in precipitation will influence the soil water content, further influence the development of vegetation, and eventually decrease or accelerate erosion (Hou et al., 1996). In addition, the decreased rainfall reduces the rainfall erosivity and eventually lowers the amount of soil erosion, but it may also lower the density of vegetation cover due to insufficient water. Therefore, the relationships among precipitation, vegetation, topography and erosion are uncertain due to their complex interactions, and quantitative studies of their contributions and multiple interacting factors are important. These studies are important and necessary for policy-makers to develop soil and water protection measures.

Large-scale soil erosion monitoring relies heavily on the development of models, and the Revised Universal Soil Loss Equation (RUSLE) is the most widely applied empirical erosion model based on the Universal Soil Loss Equation (USLE) (Wishmeier and Smith, 1978; Renard et al., 1997). Using the detailed surface information provided by remote sensing, the RUSLE model has successfully been applied to a variety of spatial scale assessments of soil erosion, from the plot scale to the global scale (Thiam, 2003; Vrieling, 2006; Van der kniff, 1999; Van der kniff, 2000; Borrelli et al., 2013). Specifically, for the RUSLE model, the soil erodibility (K factor) and topography (LS) factors are stable over a long time period and are relatively independent of anthropogenic interventions. However, the rainfall erodibility (R factor) and vegetation cover and management factor (C factor) are seasonally variable. The C factor is the most adjustable factor based on land use management (Durán Zuazo and Rodríguez Pleguezuelo, 2008; Maetens et al., 2012; Biddoccu et al., 2014; Eshel et al., 2015; Biddoccu

et al., 2016), with the highest amplitude of spatial and temporal variation among all the RUSLE factors (Estrada-Carmona et al., 2016). Similar to the C factor, the contribution of the R factor is also the amplitude of the spatial and temporal variation caused by the large variability in the monthly rainfall under the context of climate change. Because of seasonal changes in these environmental factors, the annual scales of soil erosion assessments often ignore more detailed fluctuations, and the effects of factors related to soil erosion must also have the same seasonal effects. Furthermore, the focus of soil and water conservation work is closely related to the seasonal fluctuation of soil erosion and its driving factors. Compared to existing annual scale studies, more detailed time-scale soil erosion assessments are urgently needed, which would help establish the effects and trends of various factors on soil erosion and develop soil and water conservation strategies based on seasonal fluctuations.

The aim of this work is to study the dominant factors influencing soil erosion and temporal change in the Yellow River basin of China. The specific objectives include the following: (1) obtain the distribution and monthly variation of soil erosion in the Yellow River basin; (2) quantitatively identify the dominant factors affecting the distribution pattern and variability of soil erosion on a yearly and monthly scale.

## **2 Data and methods**

### **2.1 Study area**

The study area is the Yellow River basin. The Yellow River has a total length of 5,464 km and a drainage area of 795,000  $km^2$ , accounting for 8.28% of China's land area (Figure 1). According to statistics from 1997, the population of the Yellow River basin was  $1.07 \times 10^8$ , accounting for 8.6% of the national population; additionally, the area of cultivated land in the Yellow River basin was  $1.26 \times 10^7 km^2$ , accounting for 13.3% of the country's cultivated land and making it an important agricultural development zone in China (Li et al., 2010). However, soil erosion in the Yellow River basin, especially in the middle reaches of the Loess Plateau, has become an important environmental problem that hinders local agricultural and socio-economic development (Li et al., 2010). Therefore, the soil and water conservation work in the Yellow River basin is of great significance to the sustainable development of the basin.

## 2.2 Data and processing

### 2.2.1 The RUSLE model

The soil erosion was estimated by the RUSLE model (Renard et al., 1997), which was revised based on the USLE model (Wishmeier and Smith, 1978). This model has been used to simulate and assess soil erosion worldwide using GIS and remote sensing tools. The equation is as follows:

$$A = R \times K \times LS \times C \times P, \quad (1)$$

where  $A$  is the soil erosion module,  $R$  is the rainfall erosivity factor,  $K$  is the soil erodibility factor,  $LS$  is the slope aspect factor,  $C$  is the land cover and management factor, and  $P$  is the conservation measure factor.

The  $R$  factor was computed using a diurnal rainfall model based on the Köppen climatic zone. The Yellow River basin contains 6 Köppen climatic zones: BS (arid and steppe), BW (arid and steppe), Cf (warm temperate and fully humid), Cw (warm temperate and winter dry), Dw (snow and dry winter) and Df (snow and fully humid). The specific  $R$  factor formula is as follows:

$$EI = \alpha P^\beta + \varepsilon, \quad (2)$$

where  $P$  is the daily rainfall data, and the values of  $\alpha$ ,  $\beta$ , and  $\varepsilon$  depend on the climate region. The parameters are shown in Table S2. Rainfall data from 1995 to 2015 were acquired from the National Meteorological Information Center (<http://data.cma.cn/>). A gridded rainfall erosivity dataset with a spatial resolution of 1000 m at monthly and yearly scales was interpolated using ANUSPLIN 4.2 software (Hutchinson, 2001), with data from 240 meteorological stations in the Yellow River basin and its surrounding areas.

We computed the soil erodibility ( $K$  factor) using the land erosion-productivity impact model (EPIC) developed by Williams et al. (1990) as follows:

$$K = \left[ 0.2 + 0.3e^{-0.0256SAN\left(1-\frac{SIL}{100}\right)} \right] \left( \frac{SIL}{CLA+SIL} \right)^{0.3} \left( 1.0 - \frac{0.25C}{C+e^{3.72-2.95C}} \right) \left( 1.0 - \frac{0.7SN_1}{SN_1+e^{-5.51+22.9SN_1}} \right), \quad (3)$$

where  $SAN$  is the percent sand content,  $SIL$  is the percent silt content,  $CLA$  is the percent clay content,  $C$  is the percent organic carbon content, and  $SN_1 = 1 - SAN/100$ .

Factors L and S were calculated based on the interaction of topography and flow accumulation. Thus, the 90 m digital elevation model (DEM) dataset STRM3 DEM (<http://srtm.csi.cgiar.org/>) was used. For S, the formula of McCool et al. (1987) was selected for slopes below 10°, and the formula of Liu et al. (1994) was used for slopes above 10°. The specific formula is as follows:

$$S = 10.8 \times \sin\theta + 0.03 \quad (\theta < 5^\circ), \quad (4)$$

$$S = 16.8 \times \sin\theta - 0.5 \quad (5^\circ \leq \theta < 10^\circ), \quad (5)$$

$$S = 21.9 \times \sin\theta - 0.96 \quad (10^\circ \leq \theta), \quad (6)$$

where  $\theta$  is the slope value.

The L factor was computed using the method developed by Liu et al. (2010), based on the expression in Foster and Wischmeier (1974).

$$L_i = \frac{\lambda_{out}^{m+1} - \lambda_{in}^{m+1}}{(\lambda_{out} - \lambda_{in})^{22.13^m}}, \quad (7)$$

$$m = \begin{cases} 0.2 & \theta \leq 0.5^\circ \\ 0.3 & 0.5^\circ < \theta \leq 1.5^\circ \\ 0.4 & 1.5^\circ < \theta \leq 3^\circ \\ 0.5 & \theta > 3^\circ \end{cases}, \quad (8)$$

where  $L_i$  is the L factor of the  $i$ -th grid,  $\lambda_{out}$  and  $\lambda_{in}$  are the slope lengths of the exit and entrance, respectively, and  $m$  is the slope length index.

The C factor is defined as the ratio of soil loss under the given vegetation cover to that which would occur under continuously bare soil. The C factors were acquired from previous large-scale studies in Europe (Van der kniff, 1999, 2000), and the detailed equation is as follows:

$$C = \exp(-2(\text{NDVI}/(1 - \text{NDVI}))), \quad (9)$$

where the NDVI is the normalized difference vegetation index. The NDVI images were acquired by the Global Inventory Modelling and Mapping Studies (GIMMS) NDVI 3g V1.0, which has a 15-day spatial resolution of 1/12 degrees that is available globally (<https://ecocast.arc.nasa.gov/data/pub/gimms/3g.v1/>). Using the maximum value composite (MVC) method, we generated monthly NDVI data based on two corresponding 15-day datasets and used the average of the generated monthly NDVI dataset to obtain the annual NDVI dataset. P is the support practice factor. Due to the lack of data and the spatial resolution of the research, this value was set to 1.

The Climate Change Initiative land cover (CCI LC) project developed by the European Space Agency with a spatial resolution of 300 m was also used in this study. The temporal frame of analysis included 20 years from 1995 to 2015, with particular attention to the five temporal nodes of 1995, 2000, 2005, 2010 and 2015.

### 2.2.2 Geographical detector

The geographical detector is a spatial variance analysis method developed to detect the heterogeneity of an event and assess the relationship between the event and its potential risk factors, including environmental and anthropogenic factors (Wang et al., 2010). The core idea is based on the assumption that if an independent variable  $X$  has an important influence on a dependent variable  $Y$ , then the spatial distributions of the independent variable  $X$  should have similarities (Wang et al., 2012, Wang et al., 2017). The proportion of the spatial distribution of dependent variable  $Y$  that can be explained by independent variable  $X$  is measured by the power of determinant ( $q$  value). The calculation is as follows:

$$q = 1 - \frac{1}{N\sigma^2} \sum_{Z=1}^L N_Z \sigma_Z^2, \quad (10)$$

$$\sigma_Z^2 = \frac{1}{N_Z - 1} \sum_{i=1}^{N_Z} (Y_{Z,i} - \bar{Y}_Z)^2, \quad (11)$$

$$\sigma^2 = \frac{1}{N - 1} \sum_{j=1}^N (Y_j - \bar{Y})^2, \quad (12)$$

where  $\sigma^2$  is the variance of  $Y$  in the region,  $\sigma_Z^2$  is the variance in zone  $Z$  divided by  $X$ ,  $N$  is the number of sample units in the region,  $N_Z$  is the number of sample units in zone  $Z$ , and  $L$  is the number of zones.  $Y_{Z,i}$  and  $Y_j$  are the values of  $Y$  in the  $i$ -th sample units of zone  $Z$  and the  $j$ -th sample unit of the entire region, respectively.

Two modules provided by a geographical detector, a factor detector module and an interaction detector module are used in this study. The factor detector module probes the extent to which factor  $X$  (independent variable) explains the spatial differentiation of attribute  $Y$  (dependent variable), and the  $q$  value of the interaction between two influencing factors was calculated using the interaction detector module. The input dataset (independent variable  $X$ ) that a geographical detector requires must be discretized, such as a land use dataset and a continuous value dataset, such as a rainfall and slope dataset, must be discretely processed by a certain method. Because geographical detector is not mandatory for which classification method to use and we referred to the work of predecessors, we divided the rainfall, slope and NDVI into nine sections using the natural break method in this study (Wang et al., 2017; Gao

and Wang., 2018). The land use dataset (CCI LC) was reclassified into nine categories based on the classification scheme of Table S1. We selected 816 randomly distributed sample points with a spatial separation of at least 15 km as statistical units for model input, and the distribution of sample points is listed in Figure S1. Specifically, the reclassified values of environmental factors such as NDVI at 816 random points are used as independent variable  $X$ , and the corresponding amount of soil erosion (which does not require reclassification processing) is taken as the dependent variable  $Y$ . The above data is used as data input for the two modules (factor detector module and an interaction detector module) of the geographical detector. We conducted a geographical detector method with ArcGIS 10.5 and the R package “geodetector” (<https://cran.r-project.org/web/packages/geodetector/index.html>).

### 3 Results.

#### 3.1 Distribution and monthly variation of soil erosion

The soil erosion in the Yellow River basin in 2015 showed a high degree of spatial heterogeneity. The areas with large amounts of soil erosion were mainly concentrated in the middle reaches of the Yellow River. In Inner Mongolia, Shandong, southwestern Shaanxi, northern Ningxia and western Gansu, the amount of soil erosion was small. There is a large risk of soil erosion in the eastern part of Qinghai, southern Gansu, southern Ningxia and north-western Shaanxi, which is caused by pressures from soil and water conservation. From the perspective of the basin, the middle reaches of the Yellow River, such as the Weihe River, face a high risk of soil erosion. Although the soil erosion intensity in the lower reaches of the Yellow River is not high, the sediment caused by the erosion of the middle reaches of the Yellow River causes sedimentation in the downstream riverbed, which further affects the atrophy and uplift of the riverbed in the downstream area. The lower reaches of the Yellow River also face problems, such as river channel siltation, reservoir lake siltation, and river bank erosion. Due to the thin soil layer and the exposed rock in the area of Qinghai, although the current soil erosion intensity is low, the area faces the potential danger of high soil erosion.

Figure 3 illustrates the boxplot of soil erosion and its scatter distribution for each month from 1995 to 2015. The amount of monthly soil erosion was significantly different from 1995 to 2015. The overall numerical distribution showed a more pronounced symmetrical shape: the middle months were high, and the values at the beginning and end of the year were lower. Specifically, soil erosion reached its highest

level in July with a multi-year average of 1238.5 ton/(km<sup>2</sup>·a). The average monthly soil erosion in the first and fourth quarters was relatively low, at 200.6 ton/(km<sup>2</sup>·a) and 333.2 ton/(km<sup>2</sup>·a), respectively. Compared with March, the multi-phase soil erosion in April increased by 115.79%. There was also a large drop in November compared with that in October, with a decline of 57.81%. Furthermore, the soil erosion was extremely low in January and December, with multi-phase averages of 83.3 ton/(km<sup>2</sup>·a) and 52.6 ton/(km<sup>2</sup>·a), respectively. However, the median amount of multi-phase soil erosion in May was higher than that in June, but the average was slightly lower.

### 3.2 Quantitative attribution analysis of yearly and monthly soil erosion distributions

Figure 4 illustrates the quantitative attribution of soil erosion at the annual and monthly scales; specifically, at the annual scale, topographic factors contribute more to soil erosion, and the dominant factors in different time periods are different at the monthly scale. At the annual scale, the factors affecting each factor did not change much and were relatively stable. From the annual scale, the slope and surface roughness have a greater impact, and the rainfall and vegetation effects are ranked as three or four. The topographical factor increased its influence before 2005, and the  $q$  value reached values above 0.2 and then experienced fluctuations in terms of its decline and rise. Because both are based on DEM dataset generation, the effects of surface roughness and slope present a synergistic change. The rainfall peaked in 2000, and the  $q$  value followed with a small decline.

At the monthly scale, the shock of various influencing factors was very obviously, and rainfall and slope factors had a greater impact at the beginning and end of the year, and in the middle of the year, vegetation had a greater impact. Compared to the other months, the impacts of land cover in March are the highest of those for the year. At the beginning and end of the year, when the rainfall and vegetation coverage are relatively low, rainfall has a greater impact, and in periods of high rainfall and high vegetation coverage, vegetation factors will play a leading role over the effects of other factors. The spatial resolution of the NDVI dataset used in this study was 8 km and that of the land cover dataset was 300 m. The spatial resolution of the two was quite different, which caused the detailed land cover information to be covered by the coarse-resolution vegetation information. Thus, the effect of land cover on soil erosion would be underestimated in this study. In general, the contribution rate of a single factor to soil erosion is low. Only in January 2005 did the  $q$  value of the rainfall impact reach 0.42, which was

the highest in the study. In other cases, the q value of the influencing factor of a single factor almost did not exceed 0.3.

According to Figure 4, because there is some redundancy between slope and surface roughness and the influence of land cover-related factors is low, the three main factors of topography, rainfall and vegetation are selected for analysis. The effect of pairwise interactions among the three factors on soil erosion was studied (Figure 5). In general, the interaction of two factors is more effective in explaining soil erosion than is a single factor. Similarly, the annual scale suggests that the factors affecting each factor change little and are relatively stable. At the monthly scale, the shock of various influencing factors is very obvious.

From the annual scale, the synergy between the NDVI and slope plays a greater role, followed by the synergy between the rainfall and slope. The q value of the two is approximately 0.4. The NDVI and slope, the rainfall and slope, and the slope and vegetation are similar in several typical years, including 1995, 2000, 2005, 2010, and 2015. The q value showed an upward trend in 1995 – 2005, then decreased slightly and finally increased. At the monthly scale, at the beginning and end of the year, the rainfall and slope were synergistically dominant. In the middle of the year, the vegetation and slope factors were dominant, and between 2000 and 2015, there were fewer time nodes that shared a combination of rainfall and vegetation. The rainfall and slope factors showed a relatively obvious increase and then decreased, reaching the lowest value around July. In several months, the synergy between rainfall and slope reached its highest in January 1995, and its q value was 0.727. In July 2005, the lowest value was reached, and its q value was 0.153. The synergy between vegetation and slope showed irregular oscillations in the months of 1995 and 2000. And in 2005, 2010, and 2015, a certain peak was reached in the middle of the year. The synergy between vegetation and rainfall presented irregular oscillations in the study years.

In addition, in most cases, the interaction of the two factors exhibited a significant non-linear enhancement on yearly scale and monthly scale analysis (Figure S2-S3). Taking the interaction of NDVI and rainfall as an example, the intensity of the interaction between the two was 1.07 – 1.87 times the linear sum of the two factors on the yearly scale. On the monthly scale, 95% of the cases show a nonlinear enhanced situation, and the average intensity of the interaction between the two can be 1.77 times the linear sum of the two factors, and the highest even reached 5.25 times. The intensity of this nonlinear enhancement was particularly pronounced in June, July and August.

### 3.3 Quantitative attribution analysis of yearly and monthly soil erosion variability

Figure 6 shows the effect of annual and monthly scale single factors on soil erosion. At the annual scale, the magnitude of the three factors is ranked as rainfall > slope > vegetation. In general, rainfall had a higher impact on soil erosion than did the other two factors, and the trend of the effect of rainfall first increased and then decreased. The impact reached its highest in 2005, with a q value of 0.287, and then it experienced a decline, and the q value of rainfall in 2015 was less than 0.1. The NDVI had a small impact on soil erosion changes, it experienced a slow rise. The rainfall in 2015 experienced a large increase compared to that in 2010.

At the monthly scale, the changes in the effects of the three factors are obvious, and the rainfall factor tends to have a greater impact at the beginning and end of the year due to the obvious changes in rainfall at the beginning and end of the year. The q value of the rainfall factor at the beginning and end of the year is higher. In the middle of the year, the change of rainfall is relatively low, which results in a lower impact on the amount of soil erosion in the adjacent months. For the vegetation factor, the time period with the lowest impact of the whole year is the period with the smallest q value, which occurs around July. Due to the year-round variation in the NDVI, the impact of vegetation on soil erosion changes to a lower value in the middle of the year.

Figure 7 shows the contribution of the two-factor interactions to changes in soil erosion at annual and monthly scales. At the annual scale, after 2005, the impact of the slope and rainfall interaction is declining, but at all research nodes, the interaction of the slope and rainfall is the strongest among the three factors, and the impact of vegetation on soil erosion rises. The interaction between the vegetation and rainfall experienced an initial increase and then a decrease. At the monthly scale, the interaction between the rainfall and slope presented a symmetrical pattern, with a greater effect at the beginning and end of the year; furthermore, it reached its lowest value for the year around July. However, the others showed a vibrating state. Overall, the two-factor interaction was more powerful than was the single-factor interpretation, and changes in soil erosion were more sensitive to fluctuations in rainfall than to fluctuations in vegetation.

Similarly, in terms of the effects of the interaction between two factors on soil erosion variability, the interaction of the two factors also showed a significant nonlinear enhancement on yearly and monthly scales (Figure S4-5). On the annual scale, the intensity of the interaction between NDVI and rainfall was

1.14-1.86 times the linear sum of the two, the interaction between NDVI and slope was 1.48-3.00 times, and the interaction intensity between rainfall and slope was 1.21-2.30 times. On the monthly scale, taking the interaction of NDVI and rainfall as an example, 92.7% of the cases showed a nonlinear enhanced situation. The average intensity of the interaction between the two factors can be 1.44 times the linear sum of the two, and the highest even reached 3.81. Times.

## **4 Discussion**

### **4.1 Integrating temporal and spatial heterogeneity effects into soil erosion management**

Ecosystems are complex entities that span geographic and temporal scales and are inconsistent with various man-made jurisdictional and political demarcations (Bodin, 2017). Given these conditions, it is important for the structures of governance to solve the institutional fragmentation and match the temporal and spatial extents of ecosystem processes (Lubell, 2013). Cross-border and cross-scale collaboration is often seen here as a means by which to overcome such institutional fragmentation (Cosens, 2013; Walker et al., 2009). Therefore, it is urgent to integrate temporal and spatial heterogeneity effects into erosion management and to achieve a collaborative environmental governance framework for soil and water conservation.

According to Figure 3, soil erosion shows a high level of temporal variability, with soil erosion being highest in July and lower at the beginning and end of the year. The reason for this heterogeneity in soil erosion is because the parameters associated with soil erosion show an equally high spatial heterogeneity (Nearing et al., 1999). The period of the highest soil erosion during the year should be the period combined with high rainfall erosivity (high R factor) and low vegetation cover (high C factor). If the annual average data are used to blindly assess soil erosion on a detailed time scale, it may cause an incorrect estimate of soil erosion, which is not conducive to the implementation of soil and water conservation work.

Based on the analyses in Figures 4-7, we found that the distribution patterns of soil erosion and the factors that drive changes in soil erosion vary from month to month. In general, for this study area, rainfall has a greater impact during periods of low rainfall and vegetation coverage, the contribution of vegetation is greater during periods of high vegetation coverage and rainfall. In short, we need to plan reasonable soil and water conservation work based on the characteristics of the time period. In recent

years, demographic, cultural and political changes have had a strong impact on deforestation, replacing forests with croplands, and this practice has led to an increase in soil erosion (Begueria et al., 2006). A large range of soil and water conservation measures have been adapted to increase agricultural production and reduce soil erosion. These techniques are mainly concentrated on reducing slope correction/water velocity (i.e., bench terraces), increasing vegetation cover (i.e., cover crop, mulching, permanent cover with tree/crop/herbaceous associations and rangeland restoration) and/or improving soil quality (i.e., amendments) (Raclot et al., 2018). However, these control measures become more concentrated by changing the C factor or the LS factor. We found that the soil erosion distribution and changes were more sensitive to the interaction of two factors compared to that of a single factor. In other words, soil erosion control measures for two or more factors may have a significant improvement. Furthermore, all of these techniques have been introduced with varying degrees of success depending on the environmental and societal contexts (De Graaff et al., 2013; García-Ruiz et al., 2013).

The formulation and implementation of land use policies and ecological protection policies cannot be constrained to certain administrative units (Chi and Ho, 2018). The management of soil erosion risk should also break through the boundaries of administrative units; however, most work is based on the three-level basin scale. Promoted by the Chinese Government, the River Chiefs system is well-placed to coordinate various governmental departments and improve the efficiency and efficacy of a multitude of water-resource management efforts, operating on the provincial, city, county, and township levels. Drawing on the experience of the River Chiefs system, it is urgent to establish a water and soil conservation management system based on different river basin level scales. Furthermore, human behaviours and multiple ecosystem processes have been interconnected, and ecosystem management may trigger possible unprecedented effects on the target and/or non-target processes (Zhao et al., 2018). Therefore, soil and water conservation is by no means an isolated act because soil erosion control may cause multiple effects from the local to regional scales (Fu et al., 2017). Using soil and water conservation as a case study, there can be positive effects, such as soil conservation and C fixation, at the local scale (Wang et al., 2015); however, it can also lead to environmental problems downstream, such as dried soil layers and water shortages (Feng et al., 2016). Large-scale soil and water conservation requires cross-sectoral and cross-regional trade-offs and coordination.

## 4.2 The direction of model improvement

Scale refers to the time and space dimension of the object of process under study, and the appropriate scale for observations is a function of the type of environment and the type of information desired (Woodcock and Strahler., 1987). The representation of geographical phenomena on the time and space scales, as the time and space resolutions of observations change, the information that is obtained also changes. The spatial scale of the application of RUSLE's original design should be only at the plot scale. However, with the deepening of the research, the RUSLE model has been applied to larger scales, e.g., nation (Van der kniff, 1999), continent (Van der kniff, 2000) and even global (Borrelli et al, 2013), by adjusting the data sources, algorithms and parameters of some factors in RUSLE. However, the exploration of using RUSLE at different temporal scales is still lacking, and a small number of studies focus on the C factor for a more in-depth discussion (Alexandridis et al., 2015; Schmidt et al., 2018). However, there has been a rapid advancement of remote sensing and GIS technology and an improvement in the satellite revisiting cycle, which provides data with different spatial and temporal resolutions and data downscaling methods. The data accumulated by long-term field testing also provide extensive and accurate verification values for the validation and application of the model. Overall, a lack of data is no longer a hindrance to the development of soil erosion models. High temporal resolution products based on MODIS data series have been widely used. The high temporal resolution of soil erosion mapping should also receive attention.

Previous scholar's improvements to RUSLE model have focused on the correction of factors. For R factor, the classic formula for rainfall erosivity needs to have continuous rainfall intensity data in the practical application, which limits the calculation of rainfall erosivity in areas where data is lacking. In recent years, scholars have proposed a number of simplified models based on more data types to try to eliminate the above difficulties, such as using annual rainfall to estimate rainfall erosivity, which has been applied in many areas (Renard and Freimund, 1994; Xu, 2005). For C factor, the differences of environment in different study areas are not the same. It is often determined according to the actual situation or a different method to determine the value of C factor. When the environment of the study area is similar to the area constructed by USLE/RUSLE model, the lookup table provided by USLE/RUSLE model is directly used to determine the value of C factor. Many scholars have first established a relationship model between vegetation coverage and C factor based on field test, then

estimate value of C factor using vegetation coverage remote sensing data. The relationship between the amount of soil erosion and various environmental factors provides some new ideas for the improvement of the RUSLE model. Based on the study of Figure 4 and Figure 6, slope has a greater impact on the spatial distribution of soil erosion, and the change in soil erosion is more sensitive to the change in rainfall. The finer R factor method and rainfall datasets can more accurately characterize the change in soil erosion, while the finer LS factor and method can invert the spatial distribution of soil erosion. Of course, any improvement in data, method, and parameters for each factor in the RUSLE model can effectively improve the accuracy of soil erosion, but it may be a more efficient direction to explore the R or LS factors in depth over the other factors.

Many of the currently developed C factor formulas combine land use and NDVI data (Panagos et al., 2015; Jiang et al., 1996; Liu et al, 2010). However, the inconsistency of the spatial resolution scale of the NDVI and land cover data result in greater uncertainty of the research in specific applications. Therefore, the adaptability of the spatial resolution of the two kinds of data should be fully considered in the development of C factor formulas that combine vegetation and land cover data.

#### 4.3 Uncertainty analysis and future perspectives

The method used to evaluate the factors affecting soil erosion was the geographical detector method, but the input of independent variable data used by this tool must be discretized according to certain principles. The choice of discretization methods will inevitably affect the interpretation of the final results. According to the previous experience of soil erosion (Gao and Wang, 2019), we used the natural break method, and the input data were divided into 9 categories. In addition, due to the lack of data and the spatial resolution of the research, P factor was set to 1, which inevitably leads to an overestimation of amount of soil erosion. If the value of P factor is based on the research results of Fu et al. (2005) on the watershed scale of the Loess Plateau, the P factor is assigned based on the slope. The final calculated amount of soil erosion is about 1/4 of the original method calculation. However, considering the applicability of scales, the P factor method at the watershed scale may not be suitable for this study. The calculation method of P factor for large scale research is worthy of further development and exploration.

This study applies the RUSLE model to a monthly scale, which violates the original intention of the RUSLE model design, but we think this was an effective attempt. The amount of monthly scale erosion that may be assessed is not accurate but reflects the trend in soil erosion at a monthly scale to

some extent. We believe that this study provides many useful ideas and inspirations for soil erosion assessment and control.

## 5 Conclusion

The current study identified the dominant factors (and combinations of factors) of soil erosion in the Yellow River basin of China and its variability in the typical years of 1990, 1995, 2000, 2005, 2010 and 2015 based on the RUSLE model and the geographical detector method.

Topographical factors such as slope and surface roughness have a greater impact on the spatial distribution of soil erosion, followed by rainfall and vegetation. In periods of low rainfall and vegetation coverage, the interaction of rainfall and slope has a great influence on the distribution of soil erosion. And in periods of high vegetation coverage and high rainfall, the spatial distribution of soil erosion is greatly affected by the synergy of vegetation and slope. The change in rainfall contributes greatly to the change in soil erosion, but the contribution decreases each year, and the contribution of vegetation change increases each year.

We found that the distribution patterns of soil erosion and the factors that drive changes in soil erosion vary from month to month and vary from area to area. It is necessary to combine the temporal and spatial heterogeneity with the soil erosion management and form a collaborative environmental governance framework. A finer LS factor formula, terrain datasets, R factor formula and rainfall datasets can more accurately characterize the distribution and variation of soil erosion. Future research needs to develop soil erosion assessment models for higher temporal resolutions (monthly scale) to cope with soil erosion risks.

## Acknowledgements

This research was funded by the National Key R&D Program of China (No. 2017YFA0604704), the National Key Research Program of China (No. 2016YFC0501604), and the Fundamental Research Funds for the Central Universities. The authors thank three anonymous referees for their constructive comments on this paper.

## References

- Alexandridis, T. K., Sotiropoulou, A. M., Bilas, G., Karapetsas, N., and Silleos, N. G.: The Effects of Seasonality in Estimating the C-Factor of Soil Erosion Studies, *Land Degradation & Development*, 26, 596-603, 2015.
- Beguería, S., López-Moreno, J. I., Gómez-Villar, A., Rubio, V., Lana-Renault, N., and García-Ruiz, J. M.: Fluvial adjustments to soil erosion and plant cover changes in the central spanish pyrenees, *Geografiska Annaler*, 88, 177-186, 2010.
- Beskow, S., Mello, C. R., Norton, L. D., Curi, N., Viola, M. R., and Avanzi, J. C.: Soil erosion prediction in the Grande River Basin, Brazil using distributed modeling, *Catena*, 79, 49-59, 2009.
- Biddoccu, M., Ferraris, S., Opsi, F., and Cavallo, E.: Long-term monitoring of soil management effects on runoff and soil erosion in sloping vineyards in Alto Monferrato (North-West Italy), *Soil & Tillage Research*, 155, 176-189, 2016.
- Biddoccu, M., Opsi, F., and Cavallo, E.: Relationship between runoff and soil losses with rainfall characteristics and long-term soil management practices in a hilly vineyard (Piedmont, NW Italy), *Soil Science & Plant Nutrition*, 60, 92-99, 2014.
- Bodin Ö.: Collaborative environmental governance: achieving collective action in social-ecological systems. *Science*, 357(6352), eaan1114, 2017.
- Borrelli, P., Panagos, P., Märker, M., Modugno, S., and Schütt, B.: Assessment of the impacts of clear-cutting on soil loss by water erosion in Italian forests: First comprehensive monitoring and modelling approach, *Catena*, S0341816216300698, 2016.
- Borrelli, P., Robinson, D. A., Fleischer, L. R., Lugato, E., Ballabio, C., Alewell, C., Meusburger, K., Modugno, S., Schütt, B., and Ferro, V.: An assessment of the global impact of 21st century land use change on soil erosion, *Nature Communications*, 8, 2017.
- Brian, W., Scott, B., Stephen, P., Victor, G., Carl, F., Gustav, E. M., Frank, A., Ken, A., Stephen, C., and Kanchan, C.: Environment. Looming global-scale failures and missing institutions, *Science*, 325, 1345-1346, 2009.
- Chi, G., and Ho, H. C.: Population stress: A spatiotemporal analysis of population change and land development at the county level in the contiguous United States, 2001–2011, *Land Use Policy*, 70, 128, 2018.
- Cosens, B. A.: Legitimacy, Adaptation and Resilience in Ecosystem Management, *Ecology & Society*, 18, 103-111, 2013.
- Du, H., Dou, S., Deng, X., Xue, X., and Wang, T.: Assessment of wind and water erosion risk in the watershed of the Ningxia-Inner Mongolia Reach of the Yellow River, China, *Ecological Indicators*, 67, 117-131, 2016.
- Du, H., Xian, X., Tao, W., and Deng, X.: Assessment of wind-erosion risk in the watershed of the Ningxia-Inner Mongolia Reach of the Yellow River, northern China, *Aeolian Research*, 17, 193-204, 2015.
- Eshel, G., Egozi, R., Goldwasser, Y., Kashti, Y., Fine, P., Hayut, E., Kazukro, H., Rubin, B., Dar, Z., and Keisar, O.: Benefits of growing potatoes under cover crops in a Mediterranean climate, *Agriculture Ecosystems & Environment*, 211, 1-9, 2015.
- Estrada-Carmona, N., Harper, E. B., Declerck, F., and Fremier, A. K.: Quantifying model uncertainty to improve watershed-level ecosystem service quantification: a global sensitivity analysis of the RUSLE, *International Journal of Biodiversity Science Ecosystem Services & Management*, 13, 40-

50, 2017.

Feng, X., Fu, B., Piao, S., Wang, S., Ciais, P., Zeng, Z., Lu, Y., Zeng, Y., Li, Y., and Jiang, X.: Revegetation in China's Loess Plateau is approaching sustainable water resource limits, . *Nature Climate Change*, 6(11), 1019, 2016.

Foster, G. R., and Wischmeier, W. H.: Evaluating Irregular Slopes for Soil Loss Prediction, *Transactions of the American Society of Agricultural Engineers*, 17, 0305-0309, 1974

Fu, B., Shuai, W., Yu, L., Liu, J., Wei, L., and Miao, C.: Hydrogeomorphic Ecosystem Responses to Natural and Anthropogenic Changes in the Loess Plateau of China, *Annual Review of Earth & Planetary Sciences*, 45, 223-243, 2016.

Fu, B., Zhao, W., Chen, L., Zhang, Q., Lü Y., Gulinck, H., and Poesen, J.: Assessment of soil erosion at large watershed scale using RUSLE and GIS: a case study in the Loess Plateau of China[J]. *Land Degradation & Development*, 16, 73-85, 2005.

Fu, B., Yu, L., Lü, Y., He, C., Yuan, Z., and Wu, B.: Assessing the soil erosion control service of ecosystems change in the Loess Plateau of China, *Ecological Complexity*, 8, 0-293, 2011.

Gao, J., and Wang, H.: Temporal analysis on quantitative attribution of karst soil erosion: A case study of a peak-cluster depression basin in Southwest China, *CATENA*, 172, 369-377, 2019.

Gao, P., Mu, X. M., Wang, F., and Li, R.: Changes in stream flow and sediment discharge and the response to human activities in the middle reaches of the Yellow River. *Hydrol Earth Syst Sci*, 15, 1-10, 2010.

Garcíaruíz, J. M., Nadalromero, E., Lanarenault, N., and Beguería, S.: Erosion in Mediterranean landscapes: Changes and future challenges, *Geomorphology*, 198, 20-36, 2013.

Graaff, J. D., Aklilu, A., Ouessar, M., Asins-Velis, S., and Kessler, A.: The development of soil and water conservation policies and practices in five selected countries from 1960 to 2010, *Land Use Policy*, 32, 165-174, 2013.

Hou X, Bai G S, Cao Q Y.: Study on benefits of soil and water conservation of forest and its mechanism in loess hilly region[J]. *Research of Soil and water conservation*, 3(2): 98-103, 1996 (in Chinese).

Hutchinson, M.F.: *Anusplin Version 4.2 User Guide*. FSES, Canberra, ACT, 2001.

Jiang, Z., Wang, Z., and Zhi, L.: Quantitative Study on Spatial Variation of Soil Erosion in a Small Watershed in the Loesa Hilly Region, 1996 (in Chinese).

Jiongxin, X.: *recipitation-vegetation coupling and its influence on erosion on the loess plateau, china*, *CATENA*, 64(1), 0-116, 2005.

Keesstra, S. D.: The significance of soils and soil science towards realization of the United Nations Sustainable Development Goals, *Egu General Assembly Conference*, 2016,

Kefi, M., Yoshino, K., Setiawan, Y., Zayani, K., and Boufaroua, M.: Assessment of the effects of vegetation on soil erosion risk by water: a case of study of the Batta watershed in Tunisia, *Environmental Earth Sciences*, 64, 707-719, 2011.

Knijff, J. M. V. D., Jones, R. J. A., and Montanarella, L.: *Soil Erosion Risk Assessment in Europe*, *Acm Conference on Electronic Commerce*, 2000,

Knijff, J. M. V. D., Jones, R. J. A., Montanarella, L., Rubio, J. L., Morgan, R. P. C., Asins, S., and Andreu, V.: *Soil erosion risk assessment in Italy*, *Man & Soil at the Third Millennium International Congress of the European Society for Soil Conservation*, 1999,

Kristof, V. O., Gert, V., Sebastian, D., Bastiaan, N., François, W., Nils, B., and Johan, S.: Legacy of human-induced C erosion and burial on soil-atmosphere C exchange, *Proceedings of the National*

Academy of Sciences of the United States of America, 109, 19492-19497, 2012.

Lal, R., . Soil carbon sequestration impacts on global climate change and food security, *Science*, 304, 1623-1627, 2004.

Li, X., Ni, J., Yang, Q., and Li, T.: Potential Risks of Soil Erosion in the Yellow River Basin and Its Transformation, *Journal of Natural Resources*, 12, 2052-2059, 2010 (in Chinese).

Liu B Y, Bi X G, Fu S H, Wei X, Li Y G, Duan S H, Yuan A P, Lu B J, Xie Y, Zhang W B, Ye Z H, Zeng X Q, Xu I.: Beijing Soil Loss Equation. Science Press, Beijing, China, 2010 (in Chinese).

Liu, B. Y., Nearing, M. A., and Risse, L. M.: Slope Gradient Effects on Soil Loss for Steep Slopes, *Transactions of the ASAE*, 37, 1835-1840, 1994.

Liu, B. Y., Nearing, M. A., Shi, P. J., and Jia, Z. W.: Slope length effects on soil loss for steep slopes, *Soil Science Society of America Journal*, 64, 1759-1763, 2000.

Liu, L., and Liu, X. H.: Sensitivity Analysis of Soil Erosion in the Northern Loess Plateau, *Procedia Environmental Sciences*, 2, 134-148, 2010.

Lubell, M.: Governing institutional complexity: the ecology of games framework. *Policy Studies Journal*, 41(3), 537-559, 2013.

Maetens, W., Poesen, J., and Vanmaercke, M.: Effects of land use on annual runoff and soil loss -a meta-analysis of a European and Mediterranean plot database, *Egu General Assembly Conference*, 2012.

Martínez-Casasnovas, J. A., Ramos, M. C., and Benites, G.: Soil and water assessment tool soil loss simulation at the sub-basin scale at the Alt Penedes-Anoia vineyard region (NE Spain) in the 2000s, *Land Degradation & Development*, 27, 160-170, 2016.

McCool, D. K., Brown, L. C., Foster, G. R., Mutchler, C. K., and Meyer, L. D.: Revised slope steepness factor for the universal soil loss equation, *Transactions of the ASAE - American Society of Agricultural Engineers (USA)*, 30, 1387-1396, 1987.

Nearing, M. A., Govers, G., and Norton, L. D.: Variability in Soil Erosion Data From Replicated Plots, *Soil Science Society of America Journal*, 63, 1829-1835, 1999.

Panagos, P., Borrelli, P., Meusburger, K., Alewell, C., Lugato, E., and Montanarella, L.: Estimating the soil erosion cover-management factor at the European scale, *Land Use Policy*, 48, 38-50, 2015.

Peng, T., and Wang, S.: Effects of land use, land cover and rainfall regimes on the surface runoff and soil loss on karst slopes in southwest China, *Catena*, 90, 53-62, 2012.

Raclot, D., Bissonnais, Y. L., Annabi, M., Sabir, M., and Smetanova, A.: Main Issues For Preserving Mediterranean Soil Resources From Water Erosion Under Global Change: Mediterranean Soil Resources Under Global Change, *Land Degradation & Development*, 2017.

Renard, K. G., and Freimund, J. R.: Using monthly precipitation data to estimate the r-factor in the revised usle, *Journal of Hydrology*, 157(1-4), 0-306, 1994.

Renard, K. G., Foster, G. R., Weesies, G. A., Mccool, D. K., and Yoder, D. C.: Predicting soil erosion by water: a guide to conservation planning with the Revised Universal Soil Loss Equation (RUSLE), *Agricultural Handbook*, 1997.

Ronald, A., Asmeret Asefaw, B., Hopmans, J. W., Carolyn, O., A Ester, S., and Sparks, D. L.: Soil science. Soil and human security in the 21st century, *Science*, 348, 1261071, 2015.

Sabbi, A., and Salvati, L.: Searching for a downward spiral? soil erosion risk, agro-forest landscape and socioeconomic conditions in italian local communities, *Land Use Policy*, 41(4), 388-396, 2014.

Schmidt, S., Alewell, C., and Meusburger, K.: Mapping spatio-temporal dynamics of the cover and management factor (C-factor) for grasslands in Switzerland, *Remote Sensing of Environment*, 211,

89-104, 2018.

Sun, W. Y., Shao, Q. Q., Liu, J. Y., and Zhai, J.: Assessing the effects of land use and topography on soil erosion on the Loess Plateau in China, *Catena*, 121, 151-163, 2014.

Thiam, A. K.: The causes and spatial pattern of land degradation risk in Southern Mauritania using multitemporal AVHRR-NDVI imagery and field data, *Land Degradation & Development*, 14, 133-142, 2010.

Tian, Y. C., Zhou, Y. M., Wu, B. F., and Zhou, W. F.: Risk assessment of water soil erosion in upper basin of Miyun Reservoir, Beijing, China, *Environmental Geology*, 57, 937-942, 2009.

Vrieling, A.: Satellite remote sensing for water erosion assessment: A review, *Catena*, 65, 2-18, 2006.

Wang, J. , & Xu, C.: Geodetector: principle and prospective. *Acta Geographica Sinica*, 72 (1): 116-134, 2017.

Wang, J. F., and Hu, Y.: Environmental health risk detection with GeogDetector, *Environmental Modelling & Software*, 33, 114-115, 2005.

Wang, J., Li, X., G, Christakos, Liao, Y., Zhang, T., & Gu, X.: Geographical detectors-based health risk assessment and its application in the neural tube defects study of the heshun region, china. *International Journal of Geographical Information Systems*, 24(1), 21, 2010.

Wang, S., Fu, B., Piao, S., Lu, Y., Ciais, P., Feng, X., and Wang, Y.: Reduced sediment transport in the Yellow River due to anthropogenic changes, *Nature Geoscience*, 9, 38-41, 2015.

Wenyi, SHAO, Quanqin, and Jiyuan: Soil erosion and its response to the changes of precipitation and vegetation cover on the Loess Plateau, *Journal of Geographical Sciences*, 23, 1091-1106, 2013.

Williams, J. R.: The erosion-productivity impact calculator (EPIC) model: a case history, *Philosophical Transactions Biological Sciences*, 329, 421-428, 1990.

Wischmeier, W. H., and Smith, D. D.: Predicting rainfall erosion losses - a guide to conservation planning, *Agric Handbook*, 537, 1978.

Woodcock, C. E., and Strahler, A. H.: The factor of scale in remote sensing, *Remote Sensing of Environment*, 21, 311-332, 1987.

Wu, X., and Cai, Y.: Advances of researches in relationship between LUCC and soil erosion, *Progress in Geography*, 22(6), 576-584, 2003 (in Chinese).

Yang, L., Fan, H., Guo, C., Wang, T., and Zheng, Guo.: Experimental study of soil erosion in different slopes, *Research of Soil and Water Conservation*, (A04), 237-239, 2007 (in Chinese).

Zhao, H., Tang, Y., and Yang, S.: Dynamic identification of soil erosion risk in the middle reaches of the Yellow River Basin in China from 1978 to 2010, *Journal of Geographical Sciences*, 28, 175-192, 2018a.

Zhao, W., Yue, L., Daryanto, S., Fu, B., Shuai, W., and Liu, Y.: Metacoupling supply and demand for soil conservation service, *Current Opinion in Environmental Sustainability*, 33, 136-141, 2018b.

Zhou, P., Luukkanen, O., Tokola, T., and Nieminen, J.: Effect of vegetation cover on soil erosion in a mountainous watershed, *Catena*, 75, 319-325, 2008.

Zuazo, V. H. D.: Soil-erosion and runoff prevention by plant covers. A review, *Agronomy for Sustainable Development*, 28, 65-86, 2008.

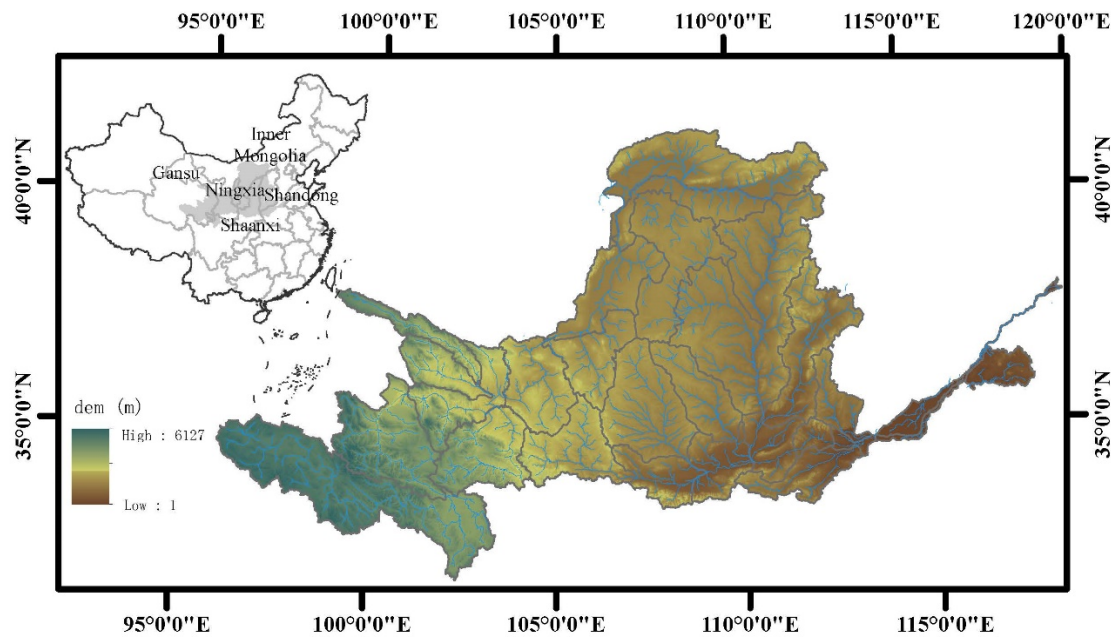

Figure 1: The location of the study area in China and the regional topography.

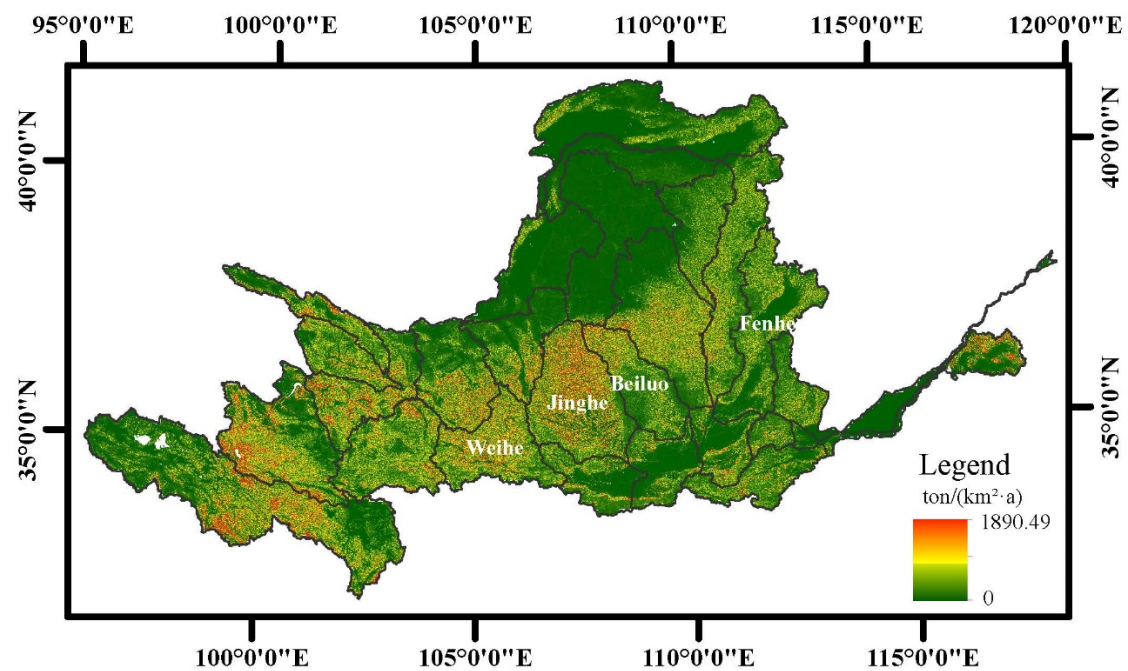

Figure 2: Distribution of soil erosion in the Yellow River basin in 2015.

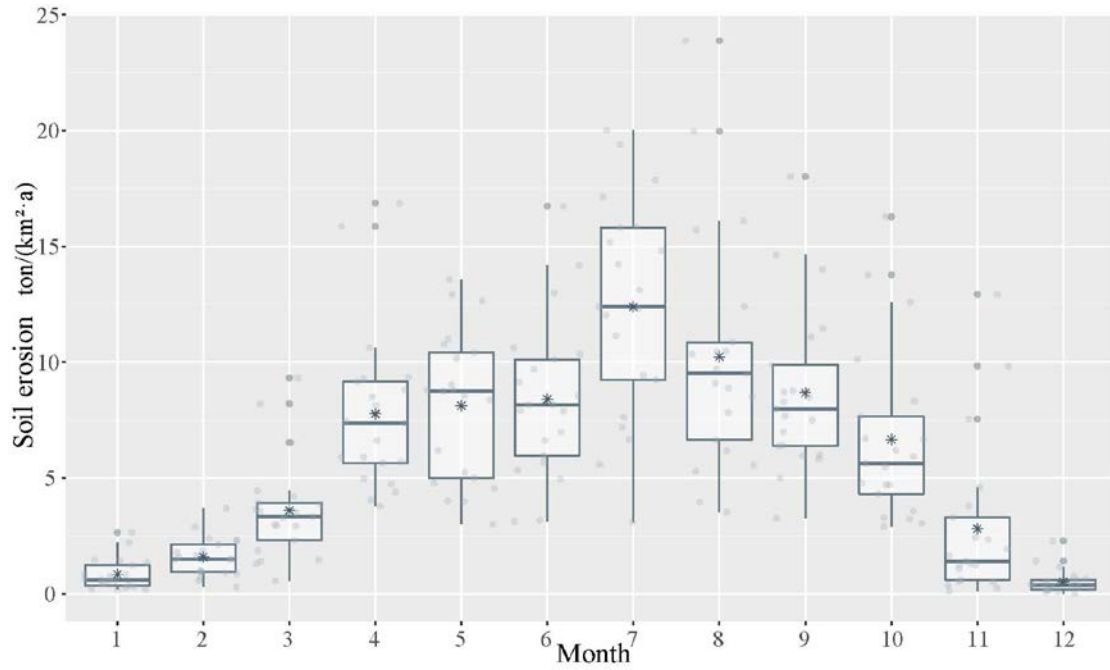

Figure 3: Variation in average monthly soil erosion from 1995 to 2015. The solid point represents the amount of soil erosion during this time period, the asterisk represents the average amount of soil erosion during this period, and the horizontal line refers to the median of soil erosion during this period.

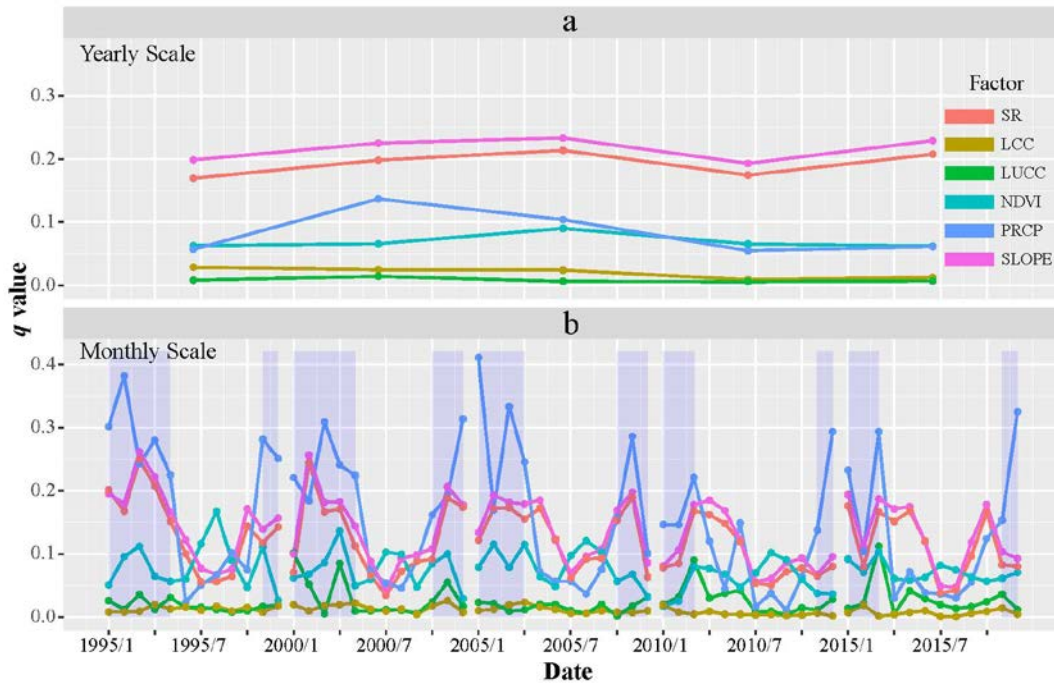

Figure 4: Contribution analysis of a single factor to the soil erosion distribution on a yearly and monthly scale. SR refers to the surface roughness, LCC refers to the land cover complexity, LUCC refers to the land use and land cover change, NDVI refers to the normalized difference vegetation index, PRCP refers to the precipitation and SLOPE refers to the surface slope gradient. The shadows of different colours represent the factors represented by the colour during this time period, which contribute more to soil erosion than other factors.

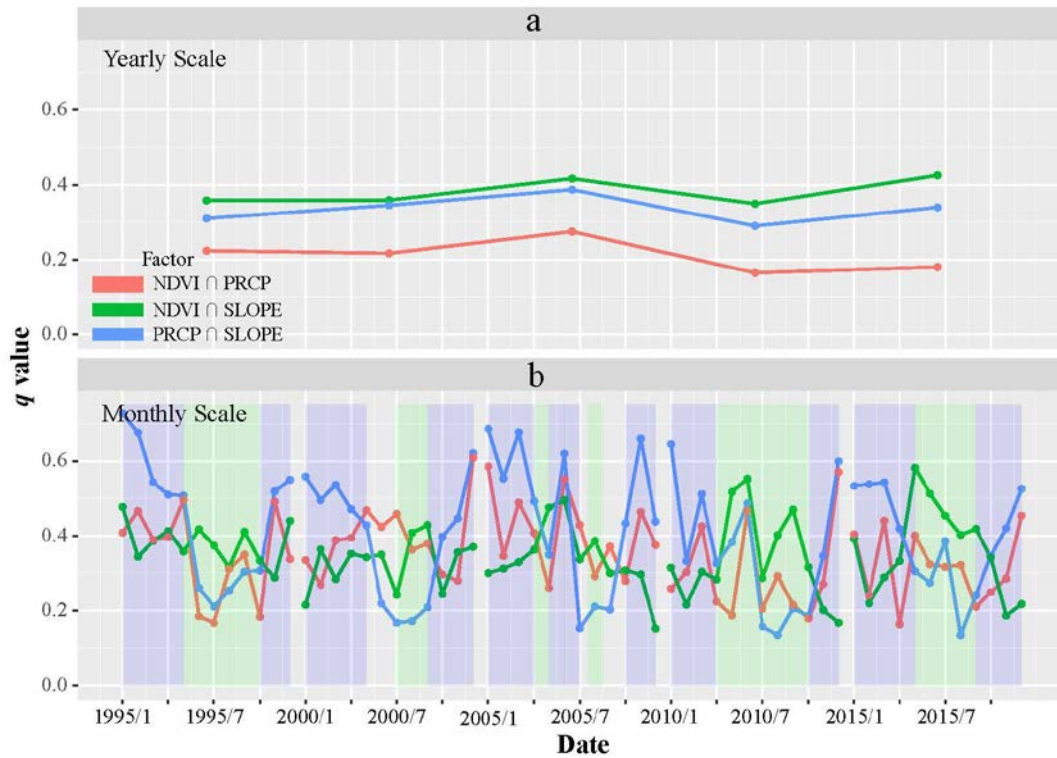

**Figure 5: Contribution analysis of multiple interacting factors to soil erosion distribution on a yearly and monthly scale, where NDVI refers to the normalized difference vegetation index, PRCP refers to the precipitation and SLOPE refers to the surface slope gradient. The shadows of different colours represent the factors represented by the colour during this time period, which contribute more to soil erosion than other factors.**

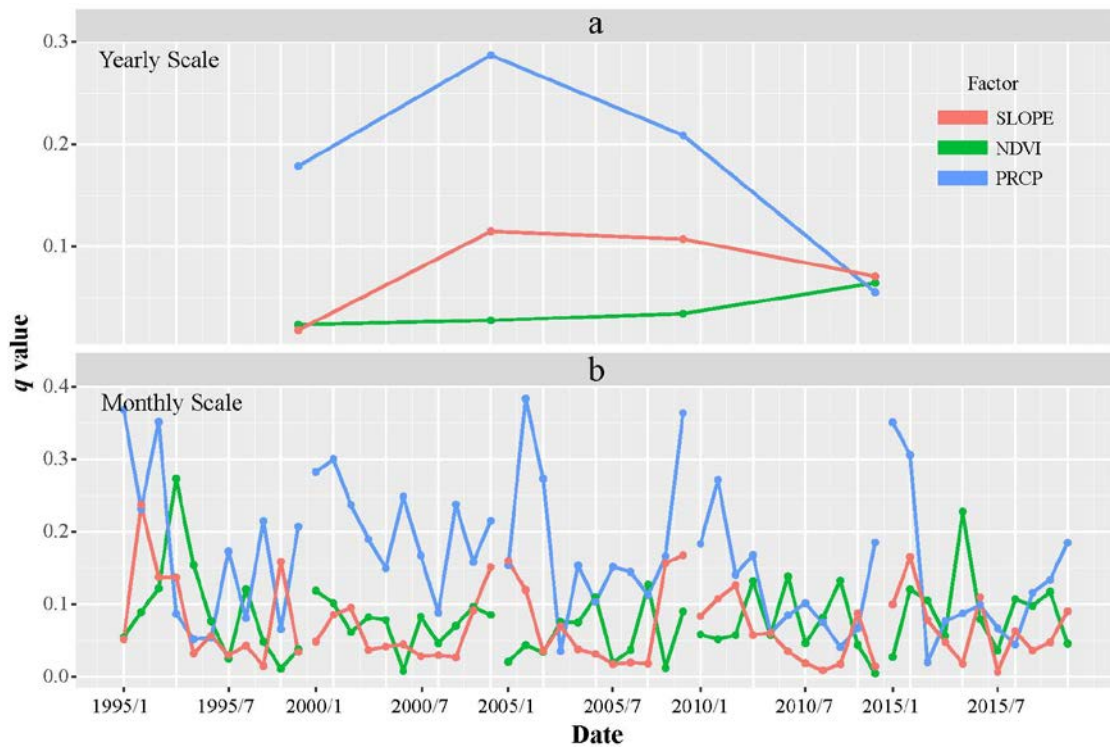

**Figure 6: Contribution analysis of a single factor to soil erosion variability on a yearly and monthly scale, where NDVI refers to the normalized difference vegetation index, PRCP refers to the precipitation and SLOPE refers to the surface slope gradient.**

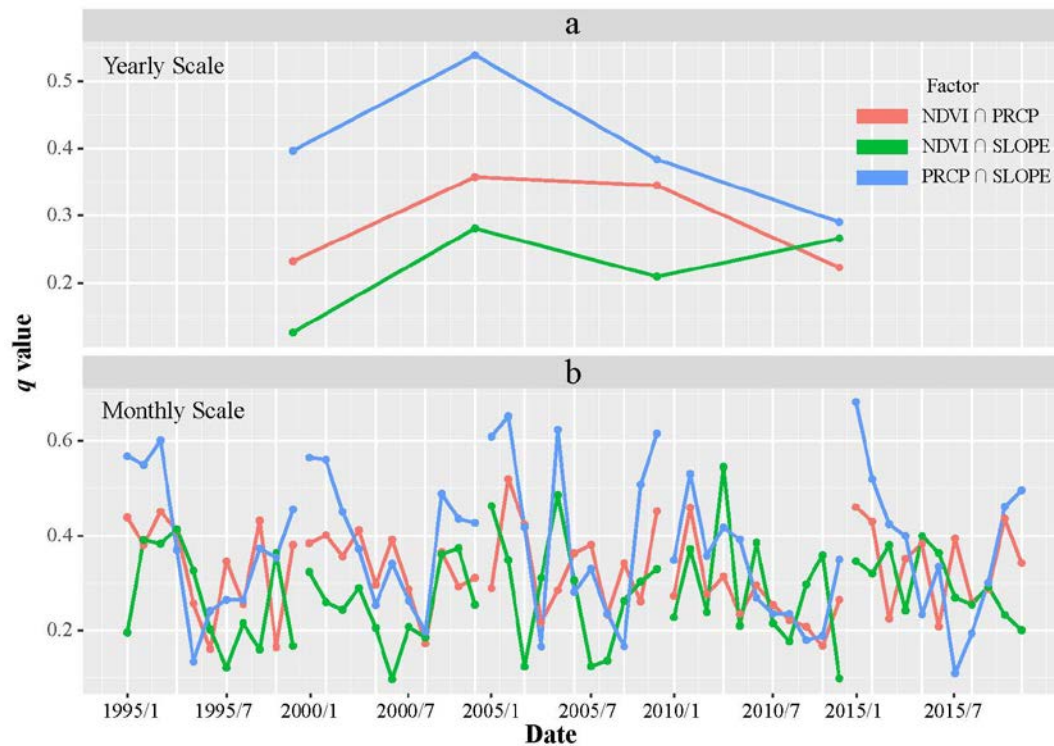

**Figure 7: Contribution analysis of multiple interacting factors to soil erosion variability in yearly and monthly scales, where NDVI refers to the normalized difference vegetation index, PRCP refers to the precipitation and SLOPE refers to the surface slope gradient.**
