# Supplementary material for: Influencing factors and their interactions of water erosion based on yearly and monthly scale analysis: A case study in the Yellow River basin of China
Source: Copernicus journal article supplement (doi:10.5194/nhess-2019-122), 2019-04-30
Supplement: Supplementary file [file nhess-2019-122-AC1-supplement.zip]

1    **Supplementary materials**

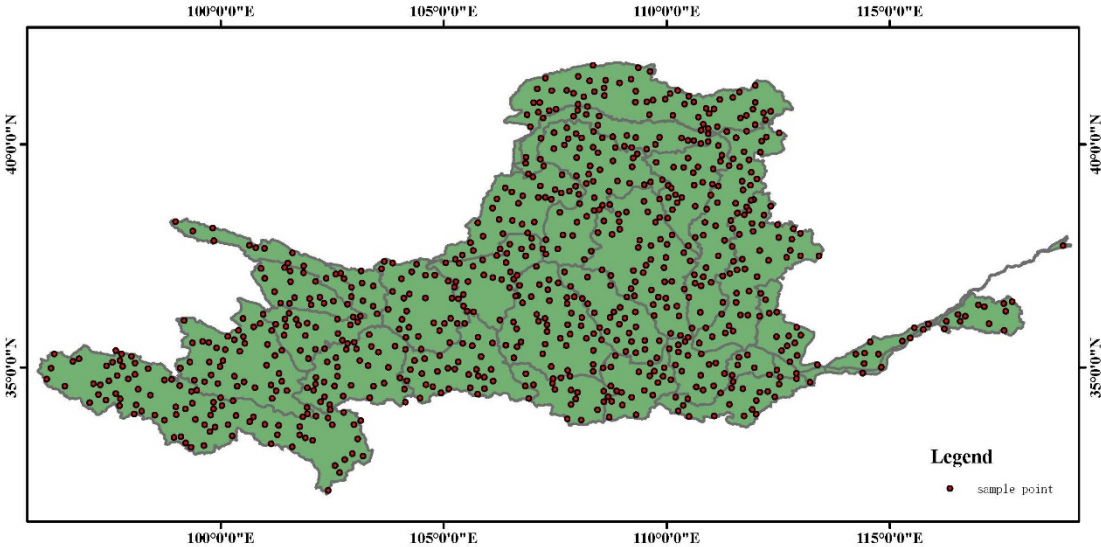

2

3    **Figure S1: Distribution of sample points required by the geographic detector model.**

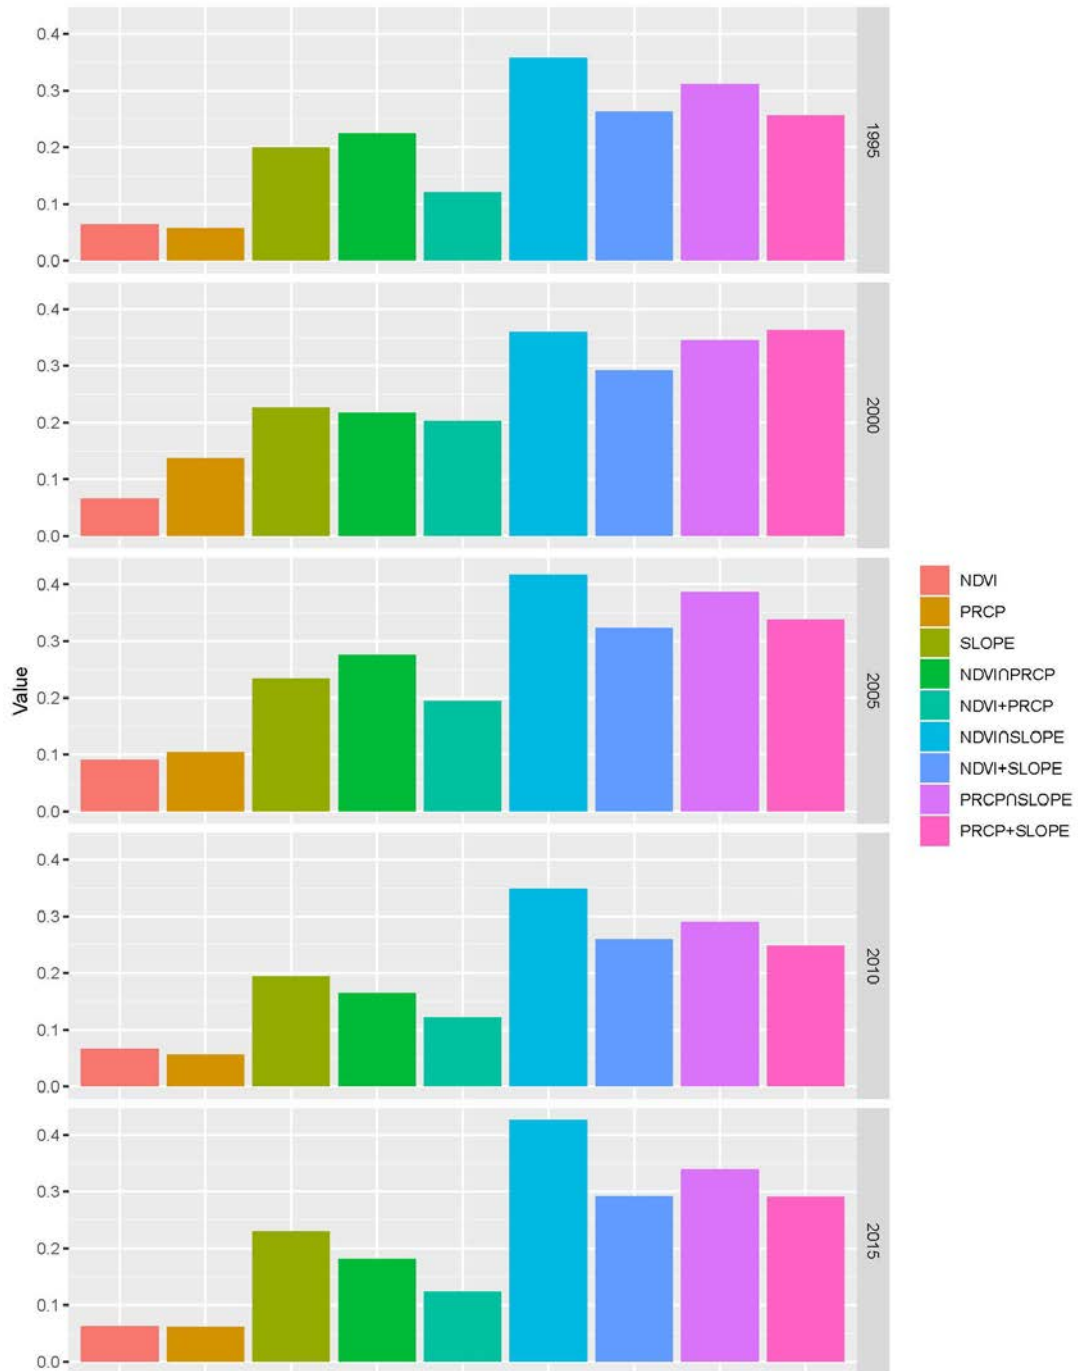

4

5 **Figure S2: The q values of influencing factors and their combinations for the distribution of soil erosion on a**

6 **yearly scale.**

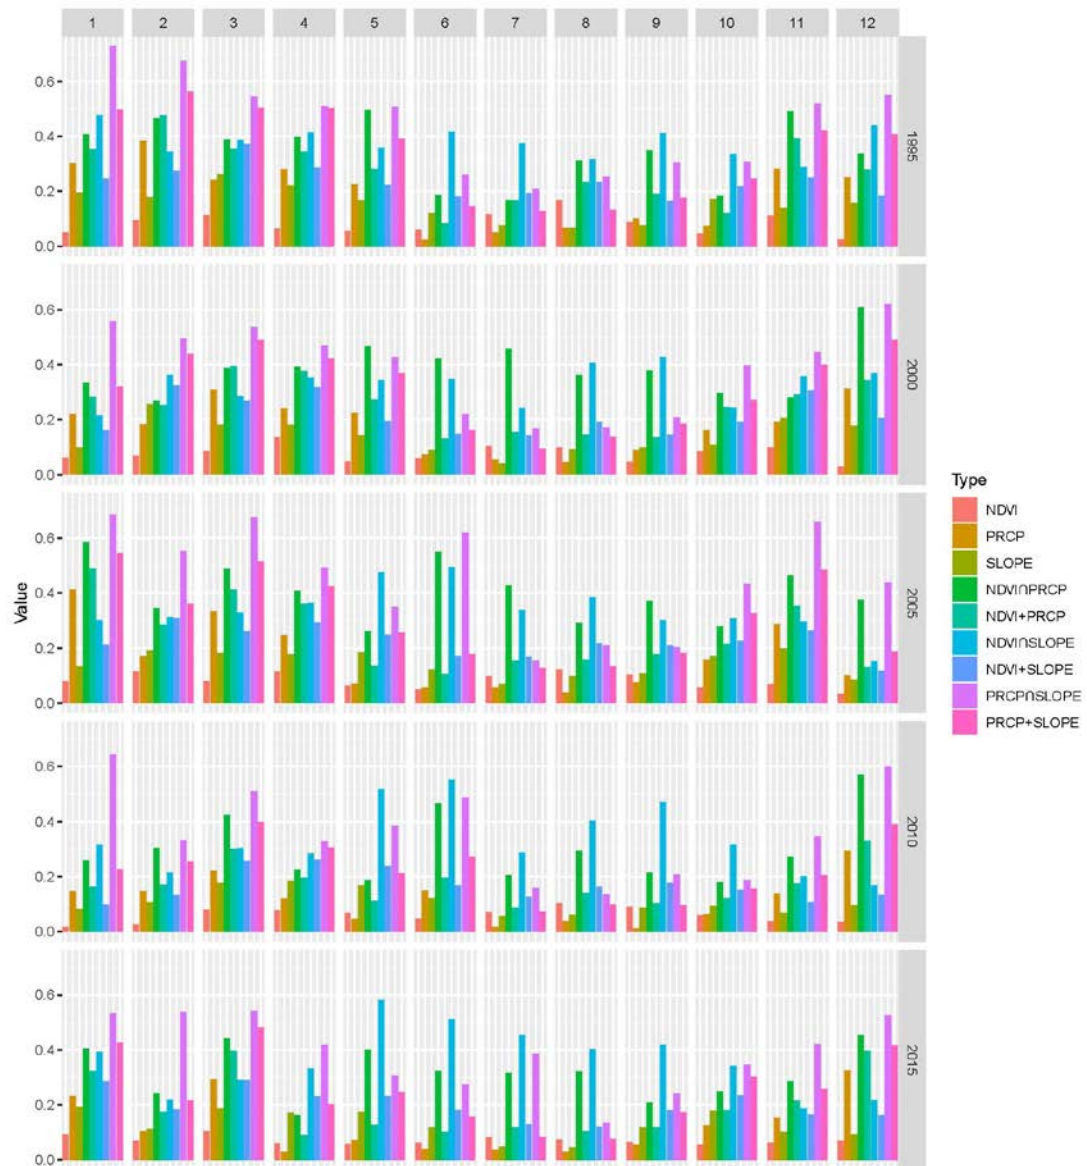

Figure S3: The q values of influencing factors and their combinations for the distribution of soil erosion on a monthly scale.

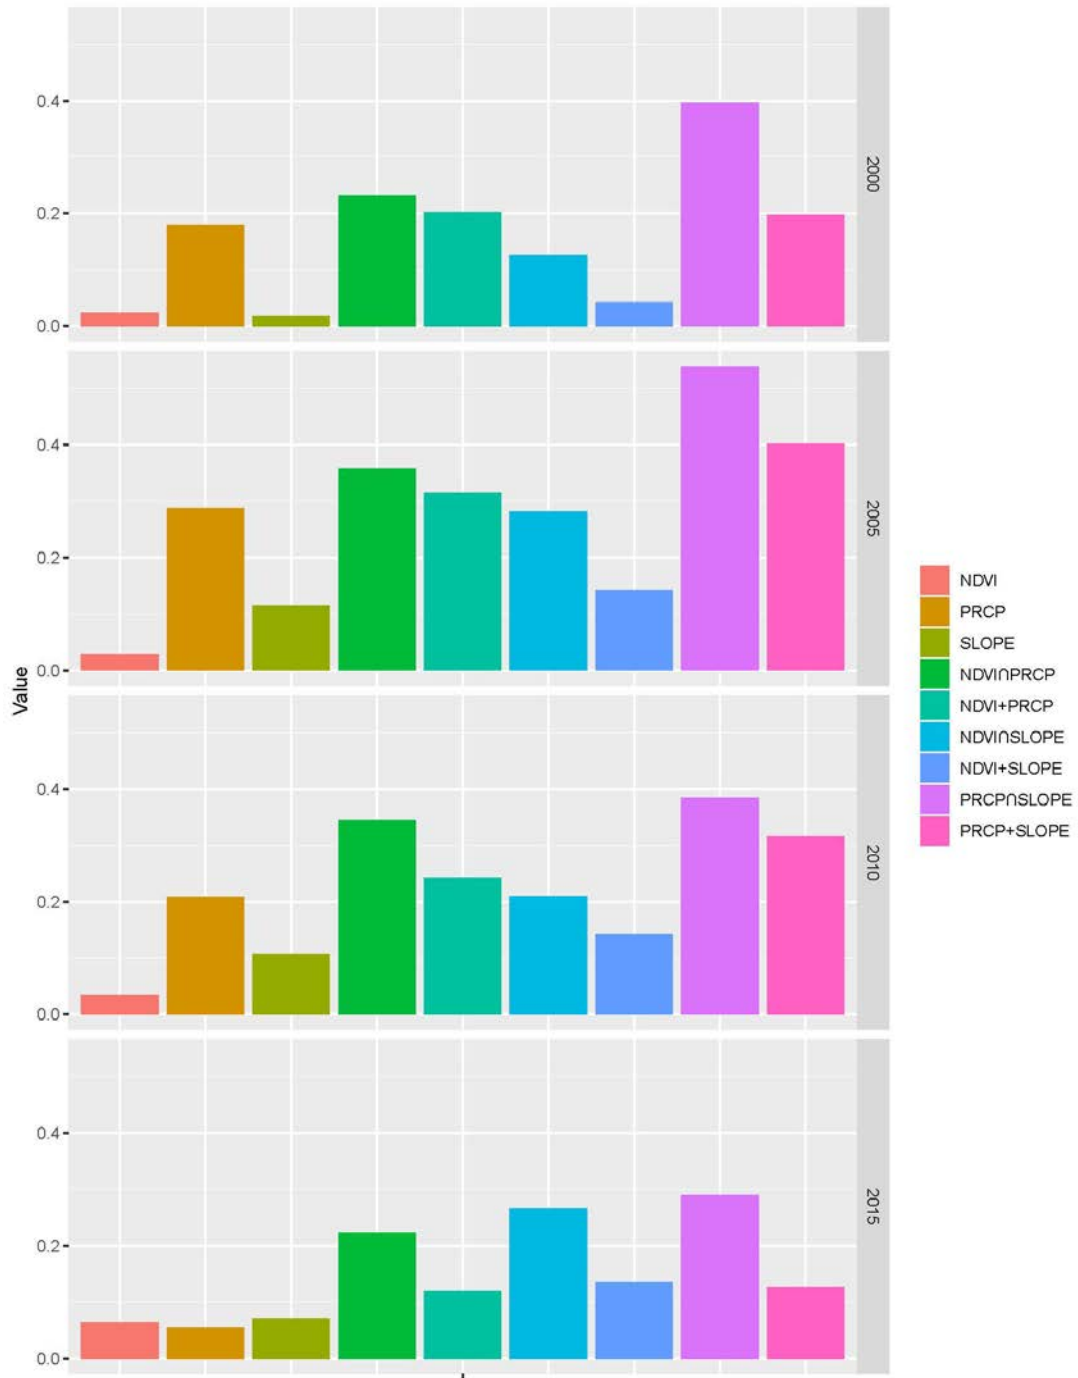

10

11 **Figure S4: The q values of influencing factors and their combinations for the variability of soil erosion on a**  
 12 **yearly scale.**

13

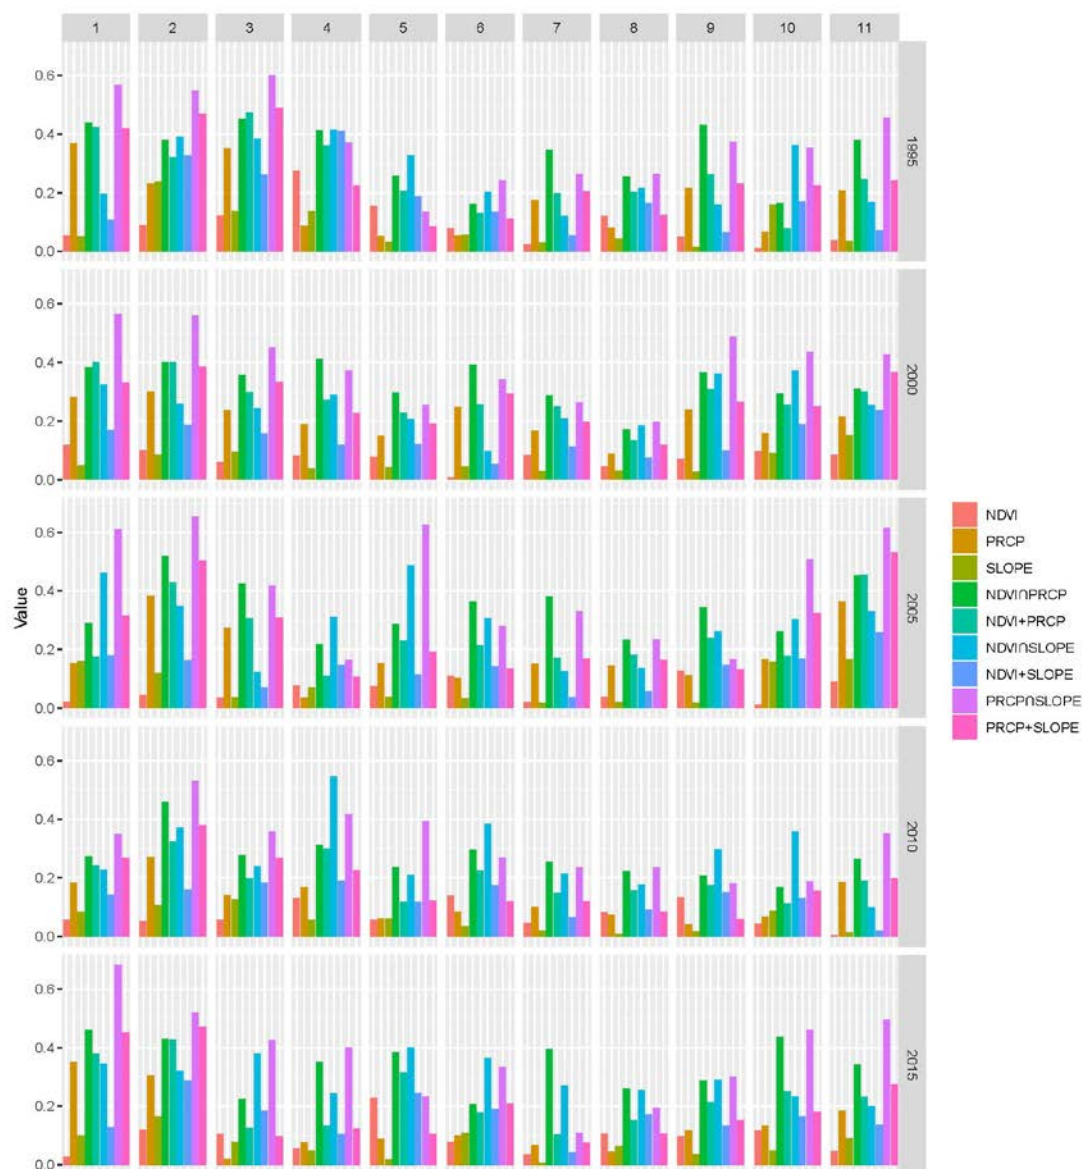

**Figure S5: The q values of influencing factors and their combinations for the variability of soil erosion on a monthly scale.**

**Table S1. Reclassification schemes of the CCI LC land cover dataset**

| CCI LC         |                                              |
|----------------|----------------------------------------------|
| 1 Forest       | 50/60/61/62/70/71/72/80/81/82/90/100/160/170 |
| 2 Grassland    | 110/130/140                                  |
| 3 Shrub        | 120/121/122                                  |
| 4 Cropland     | 10/11/12/20/30/40                            |
| 5 Wetland      | 180                                          |
| 6 Water        | 210                                          |
| 7 Construction | 190                                          |
| 8 Bare land    | 150/152/153/200/201/202                      |

**Table S2. Parameter values of the R factor formula**

| Climatic zone | $\beta$                    | $\alpha$                                   | $\varepsilon$                                  |
|---------------|----------------------------|--------------------------------------------|------------------------------------------------|
| BS            | 1.73                       | $\log \alpha = 1.85 - 1.348 \times \beta$  | 0.3296                                         |
| BW            | 1.514                      | $\log \alpha = 1.781 - 1.341 \times \beta$ | $2.123 - 0.04 \times lat$                      |
| Cf            | 1.5                        | $\log \alpha = 3.016 - 2.079 \times \beta$ | $-0.012 \times lon - 0.037 \times lat + 3.792$ |
| Cw            | 1.558                      | $\log \alpha = 2.935 - 1.94 \times \beta$  | 0.817                                          |
| Dw            | 1.466                      | $\log \alpha = 2.637 - 1.735 \times \beta$ | 1.24                                           |
| Df            | $2.243 - 0.008 \times lat$ | $\log \alpha = 9.458 - 5.236 \times \beta$ | $0.028 \times lon - 0.588$                     |

*lon* refers to the longitude, and *lat* refers to the latitude. BS refers to arid steppe zones, BW refers to arid desert zones, Cf refers to warm temperate fully humid zones, Cw refers to warm temperate desert zones, Dw refers to snow desert zones and Df refers to snow fully humid zones.
